# Supplementary material
Source: PubMed Central journal article supplement (PMC11027819)
Supplement: 262_2020_2508_MOESM1_ESM.pdf [file 262_2020_2508_MOESM1_ESM.pdf]

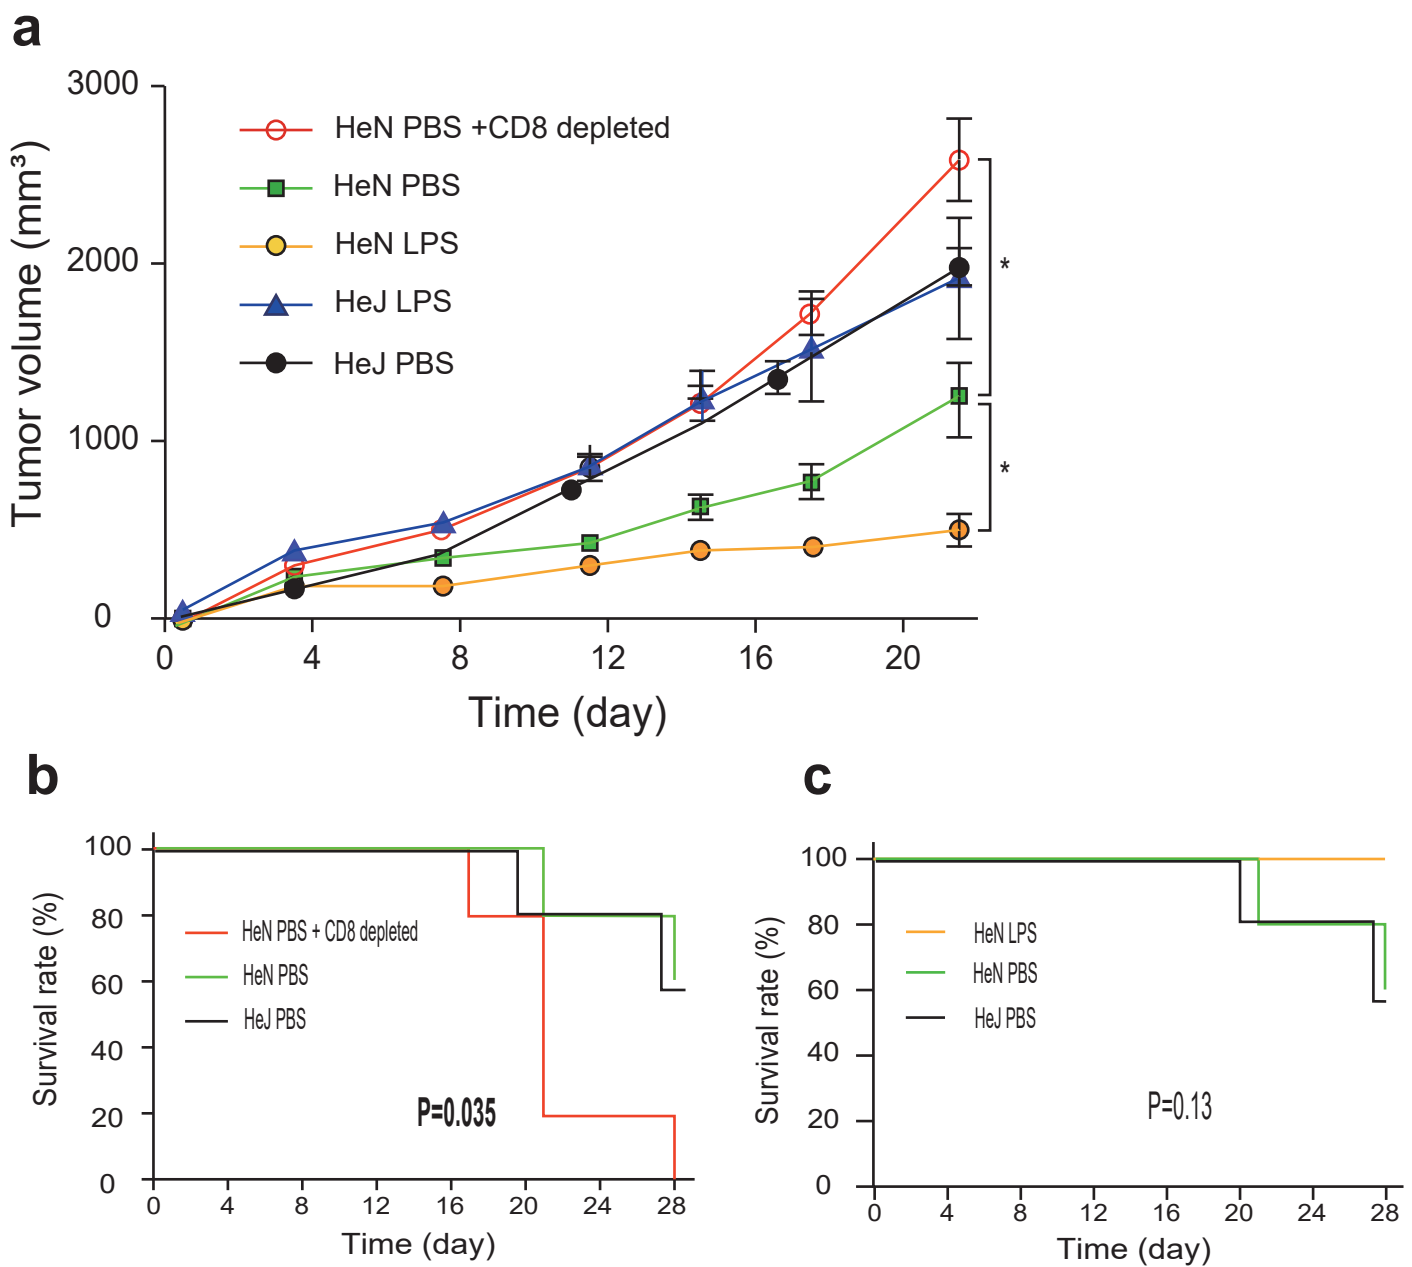

### Supplementary Figure 1

**(a)** LM8 tumor volume curve in CD8<sup>+</sup>-depleted C3H/HeN (red), C3H/HeN (green), LPS-treated C3H/HeN (orange), LPS-treated C3H/HeJ (blue) and C3H/HeJ (black) mice (n=5). LPS was administered weekly. Values represent means  $\pm$  S.D. \* indicates  $P < 0.05$  by Mann–Whitney U-test. **(b)** Kaplan–Meier curves for overall survival probability of C3H/HeN (green), C3H/HeJ (black) and CD8<sup>+</sup>-depleted C3H/HeN (red) mice with LM8 tumors (n = 5). The generalized Wilcoxon test was used for statistical analysis between C3H/HeN and CD8<sup>+</sup>-depleted C3H/HeN mice. **(c)** Kaplan–Meier curves for overall survival probability of C3H/HeN (green), C3H/HeJ (black) and C3H/HeN LPS (orange) mice with LM8 tumors (n = 5). The generalized Wilcoxon test was used for statistical analysis between C3H/HeN and C3H/HeN LPS mice.

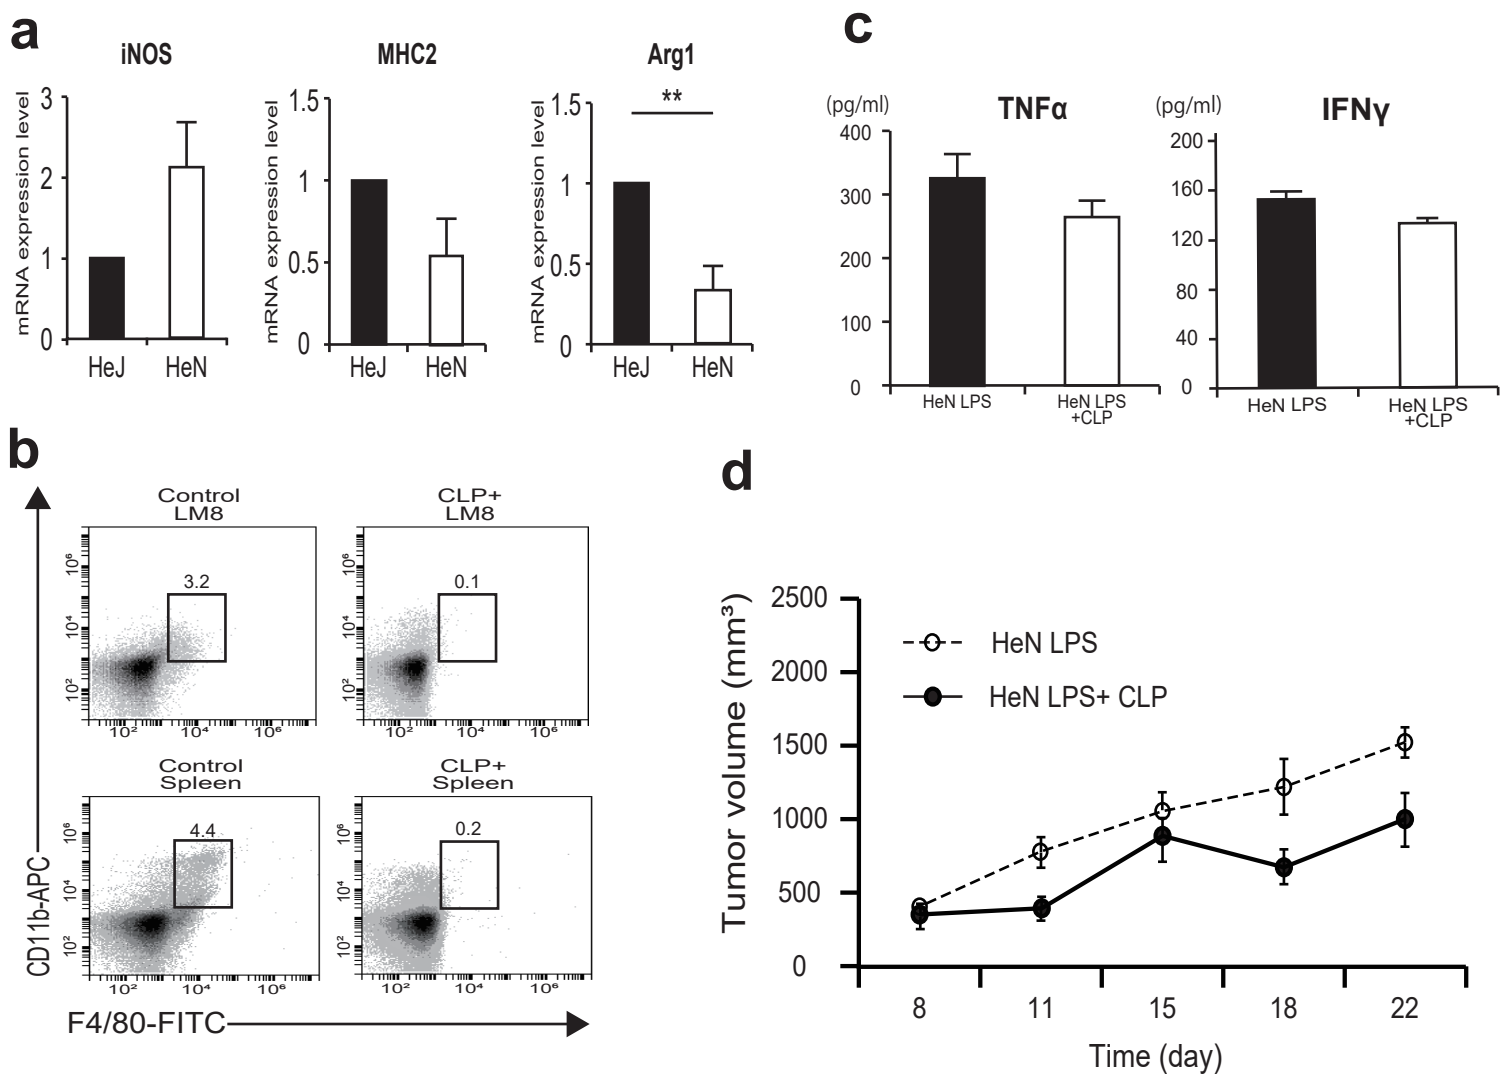

## Supplementary Figure 2

**(a)** qRT-PCR analysis of mRNA expression levels of M1 (iNOS and MHC 2) and M2 (Arg1) macrophage differentiation markers in tumor-associated macrophages in LM8 tumor. (n = 4) Values represent means  $\pm$  S.D. \*\* indicates  $P < 0.01$  by Mann–Whitney U-test. **(b)** Flow cytometry analysis of LM8 tumor and mouse spleen to confirm that macrophages were removed from the tumor and spleen after CLP administration. Data represent representative of three independent experiments. **(c)** Serum TNF $\alpha$  and IFN $\gamma$  concentrations in control C3H/HeN mice and macrophage-depleted C3H/HeN mice 6 hours after LPS administration (n=3). Values represent means  $\pm$  S.D. \* indicates  $P < 0.05$  by Mann–Whitney U-test. **(d)** LM8 tumor volume after depletion of macrophages by CLP (n=5). The dotted line represents HeN LPS mice and the solid line represents the CLP-administered HeN LPS.

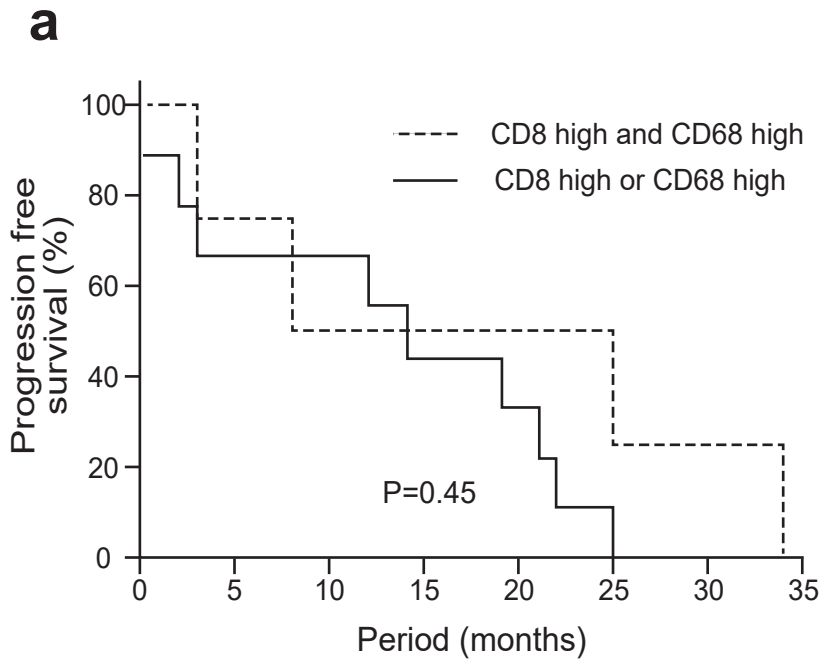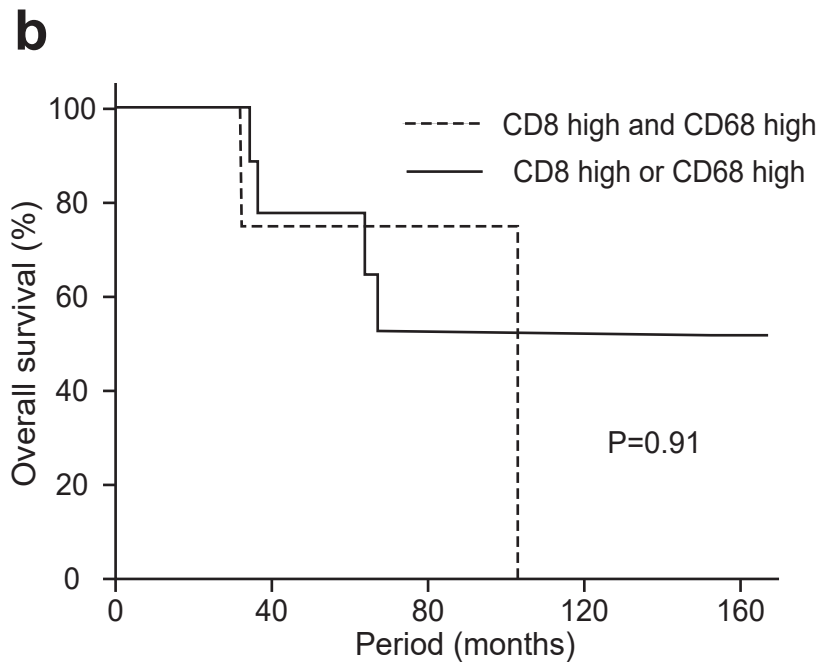

**Supplementary Figure 3**

(a,b) Kaplan-Meier curves for progression-free survival probability and overall survival probability of OS patients. The dotted line represents the CD8 and CD68 double high group (n=4) and the solid line represents CD8 or CD68 either high group (n=9). A generalized Wilcoxon test was used for statistical analysis.

## Supplementary Table1

| Subject | Age(years) | Sex <sup>1</sup> | Primary site | Adjuvant Chemotherapy <sup>2</sup> | Metastasis at diagnosis | Outcome <sup>3</sup> |
|---------|------------|------------------|--------------|------------------------------------|-------------------------|----------------------|
| 1       | 4          | M                | Humerus      | ICE                                | M0                      | DOD                  |
| 2       | 19         | M                | Tibia        | IFO                                | M0                      | DOD                  |
| 3       | 20         | M                | Humerus      | ICE                                | M1                      | DOD                  |
| 4       | 17         | F                | Femur        | ICE                                | M0                      | DOD                  |
| 5       | 17         | M                | Femur        | ICE                                | M0                      | DOD                  |
| 6       | 53         | M                | Iliac        | AP                                 | M0                      | NED                  |
| 7       | 62         | F                | Rib          | IFO                                | M0                      | DOD                  |
| 8       | 15         | M                | Fibula       | CDDP                               | M0                      | DOD                  |
| 9       | 9          | M                | Femer        | IFO                                | M0                      | NED                  |
| 10      | 9          | F                | Radius       | ICE                                | M0                      | NED                  |
| 11      | 16         | M                | Femur        | MAP+IFO                            | M1                      | DOD                  |
| 12      | 13         | M                | Femur        | MAP                                | M0                      | NED                  |
| 13      | 22         | M                | Femur        | IFO                                | M0                      | NED                  |

<sup>1</sup> Sex, F -Femal, M -Male

<sup>2</sup> Chemotherapy, MAP -methotrexate + doxorubicin+ cisplatin, IE -ifosfamide+ etoposide, IFO -ifosfamide, AP -doxorubicin + cisplatin

<sup>3</sup> Outcome, DOD -dead of disease, NED -no evidence of diaseas
